# Supplementary material for: Stable antibacterial polysaccharide-based hydrogels as tissue adhesives for wound healing
Source: PubMed Central journal article supplement — RSC Adv. 2020 May 4;10(29):17280–7. doi: 10.1039/d0ra02017f (PMC9053413; doi:10.1039/d0ra02017f), 2020-05-04
Supplement: RA-010-D0RA02017F-s002.pdf [file RA-010-D0RA02017F-s002.pdf]

## Supplementary Information

### Stable Antibacterial Polysaccharides-based Hydrogels as Tissue Adhesives for Wound Healing

Xiaoxuan Tang,<sup>a,b</sup> Xinyi Gu,<sup>a,b</sup> Yaling Wang,<sup>c</sup> Xiaoli Chen,<sup>a,b</sup> Jue Ling\*<sup>a,b</sup> and Yumin

Yang\*<sup>a,b</sup>

- a. Key Laboratory of Neuroregeneration, Neural Regeneration Co-Innovation Centre of Jiangsu Province, Nantong University, Nantong, 226001, PR China*
- b. Jiangsu Clinical Medicine Center of Tissue Engineering and Nerve Injury Repair, Nantong University, Nantong, 226001, PR China*
- c. School of Pharmacy, Nantong University, Nantong, 226001, PR China*

## Materials and Methods

**Rheological studies.** Dynamic rheology experiments were performed using a Haake RS6000 rotational rheometer (Thermo Fisher Scientific) with parallel-plate (P20 TiL; 20-mm diameter) geometry at 25°C. Time-sweep oscillatory tests of hydrogel (n = 3) were performed at a 10% strain, 1-Hz frequency, and a 0.5-mm gap.

**Evaluation of hydrogel porosity.** The different composite hydrogels were lyophilized, and immersed in anhydrous ethanol with a known volume (V1). Then, the mixture were evacuated at 0.08 kPa and the volume of ethanol-perfused hydrogels and ethanol was recorded as V2, and after removal of the hydrogels, the final volume was recorded as V3. Porosity was calculated, as follows:  $P = (V1 - V3) / (V2 - V3) \times 100\%$ .

**Swelling ratio (SR) of the hydrogels.** The hydrogels were freeze dried to determine the dry weight ( $W_d$ ) and then incubated in phosphate-buffered saline (PBS; Hyclone, Logan, UT, USA) at 37°C for 24 h, followed by removal of PBS, and weighing ( $W_s$ ). The SR of the hydrogels was calculated according to the following equation: Swelling ratio =  $W_s - W_d / W_d$ .

**Contact-angle measurement.** Contact angle measured using a JY-PHA instrument (Chengde Jinhe Instrument Manufacturing Co. Ltd., Chengde, China). Hydrogels were placed on a flat table. Then single-distilled water was added onto the surface of the hydrogel. The angle within each sample was determined as the average value of five independent experiments.

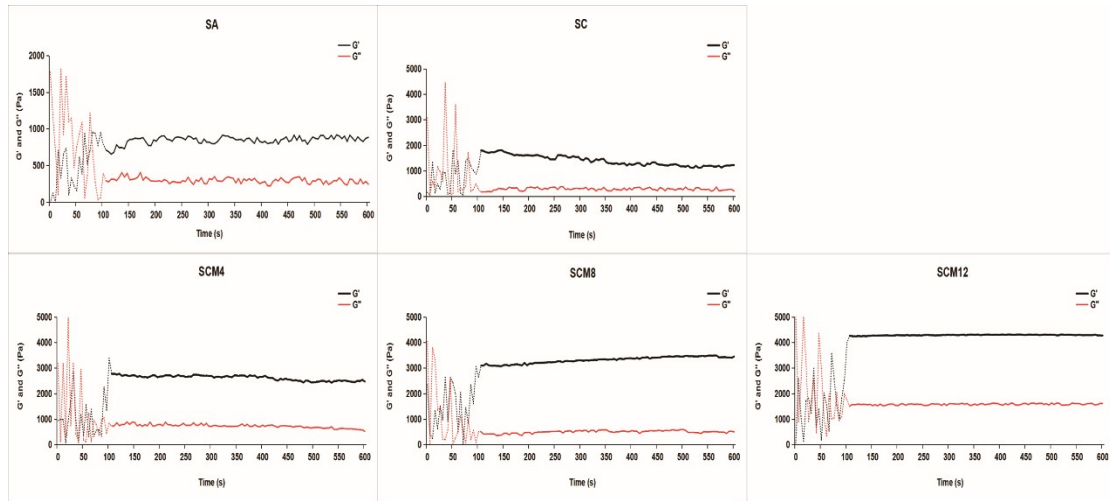

**Fig. S1.** Rheological analysis of hydrogels.

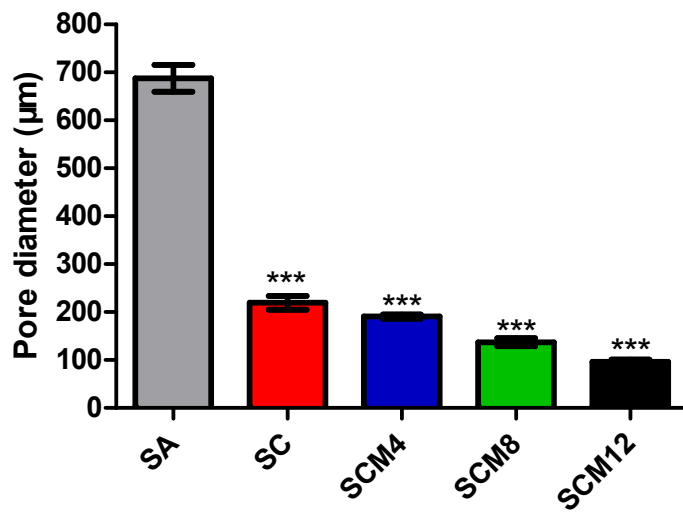

**Fig. S2.** Pore size of hydrogels. Data represent the mean  $\pm$  SD of five independent experiments. \* $p < 0.05$ ; \*\* $p < 0.01$ ; \*\*\* $p < 0.001$  vs. the SA hydrogels.

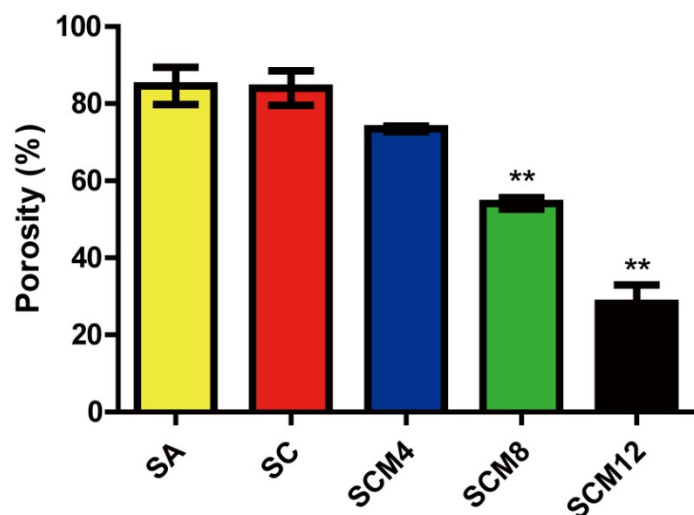

**Fig. S3.** Porosity of hydrogels. Data represent the mean  $\pm$  SD of five independent experiments. \* $p < 0.05$ ; \*\* $p < 0.01$ ; \*\*\* $p < 0.001$  vs. the SA hydrogels.

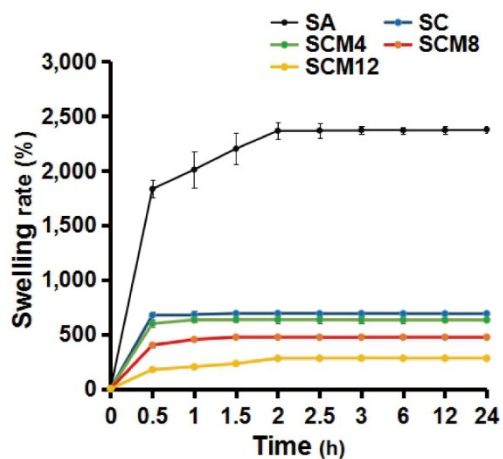

**Fig. S4.** Hydrogel swelling ratio. Data represent the mean  $\pm$  SD of five independent experiments. \* $p < 0.05$ ; \*\* $p < 0.01$ ; \*\*\* $p < 0.001$  vs. the SA hydrogels.

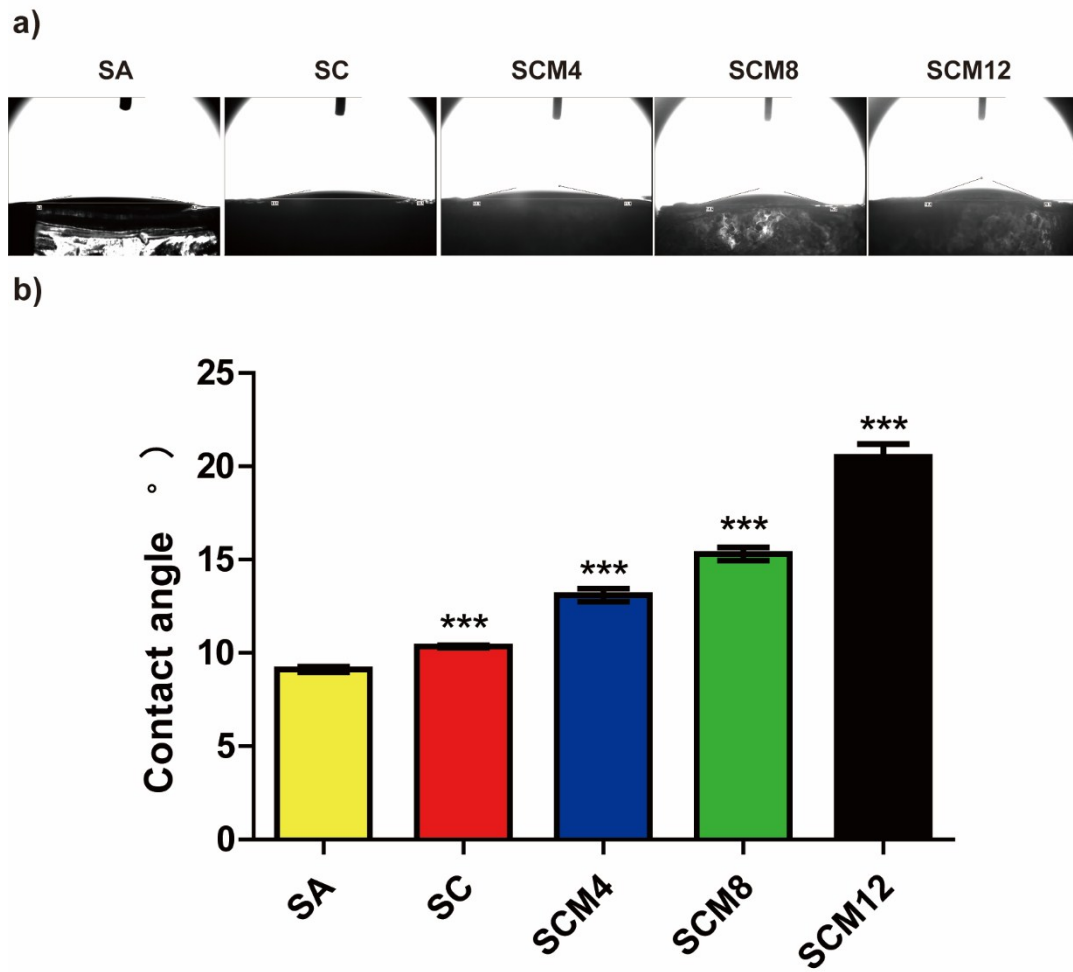

**Fig. S5.** Contact angles of hydrogels. Data represent the mean  $\pm$  SD of three independent experiments. \* $p < 0.05$ ; \*\* $p < 0.01$ ; \*\*\* $p < 0.001$  vs. the SA hydrogels.

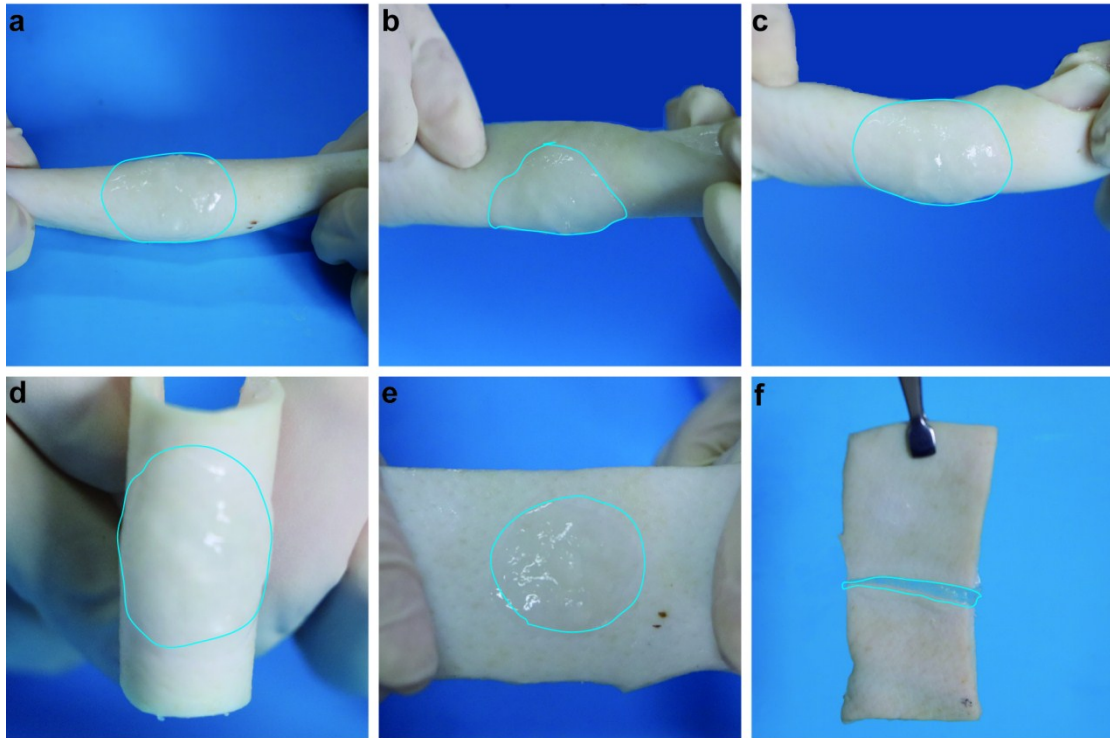

**Fig. S6.** Hydrogel adherence to porcine skin.

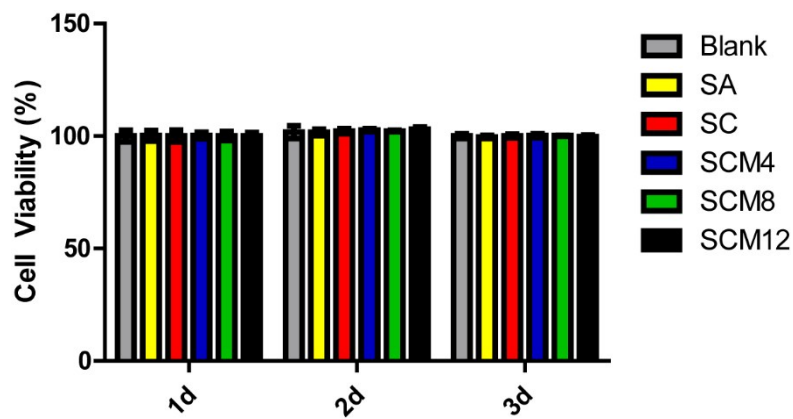

**Fig. S7.** Viability of L929 fibroblasts cultured on hydrogels for 3 days according to MTT assay.

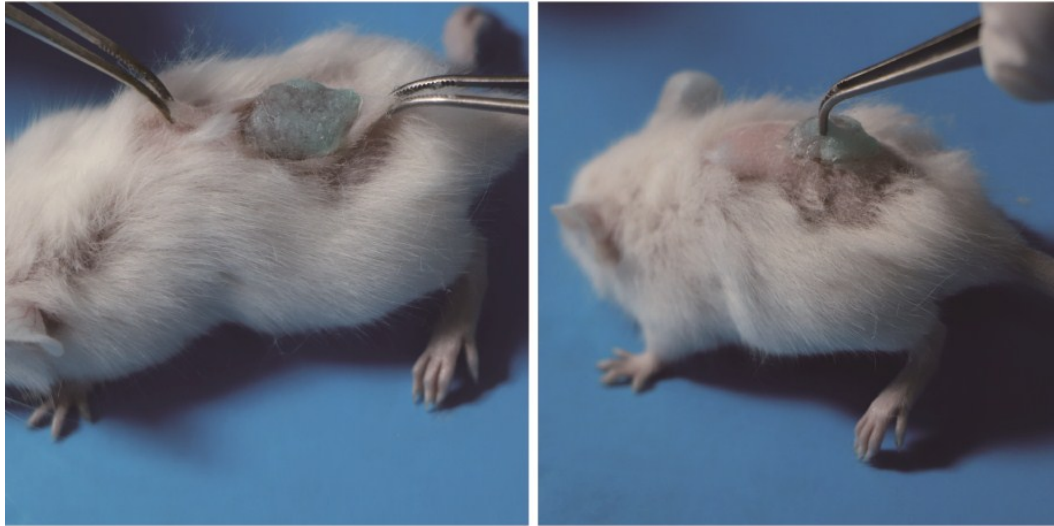

**Fig. S8.** Hydrogel adherence to skin-defect sites of the mouse wound closure model.
